# Supplementary material for: Relationship of mechanical impact magnitude to neurologic dysfunction severity in a rat traumatic brain injury model
Source: PubMed Central journal article supplement (PMC5446124; doi:10.1371/journal.pone.0178186), 2017-05-26
Supplement: pone.0178186.s001.pdf [file pone.0178186.s001.pdf]

| Impact Height (m) | Measured impact force (kgw) |  | Measured Acceleration (g) | Measured Deceleration (g) | Peak to Peak Acceleration (g) |
|-------------------|-----------------------------|--|---------------------------|---------------------------|-------------------------------|
| 1.000             | 6.312                       |  | 237.210                   | 73.660                    | 310.869                       |
| 1.000             | 6.038                       |  | 220.036                   | 62.479                    | 282.515                       |
| 1.000             | 6.043                       |  | 196.720                   | 33.530                    | 230.250                       |
| 1.000             | 4.960                       |  | 222.909                   | 58.297                    | 281.206                       |
| 1.000             | 7.250                       |  | 213.690                   | 67.460                    | 281.150                       |
| 1.000             | 4.770                       |  | 172.782                   | 36.229                    | 209.011                       |
| 1.000             | 6.549                       |  | 189.313                   | 31.086                    | 220.399                       |
| 1.000             | 6.833                       |  | 234.827                   | 55.602                    | 290.429                       |
| 1.000             | 6.708                       |  | 196.790                   | 61.080                    | 257.870                       |
| 1.000             | 6.615                       |  | 175.296                   | 48.860                    | 224.156                       |
| 1.500             | 7.061                       |  | 194.674                   | 48.936                    | 243.609                       |
| 1.500             | 7.810                       |  | 288.464                   | 66.815                    | 355.279                       |
| 1.500             | 7.061                       |  | 264.262                   | 58.393                    | 322.655                       |
| 1.500             | 6.358                       |  | 249.361                   | 56.042                    | 305.403                       |
| 1.500             | 7.352                       |  | 284.422                   | 37.208                    | 321.630                       |
| 1.500             | 8.640                       |  | 246.851                   | 68.858                    | 315.709                       |
| 1.500             | 6.980                       |  | 186.940                   | 38.991                    | 225.931                       |
| 1.500             | 7.930                       |  | 299.039                   | 70.759                    | 369.798                       |
| 1.500             | 6.289                       |  | 207.450                   | 49.273                    | 256.723                       |
| 2.000             | 8.520                       |  | 346.137                   | 61.466                    | 407.603                       |
| 2.000             | 9.573                       |  | 378.849                   | 96.963                    | 475.812                       |
| 2.000             | 9.847                       |  | 338.424                   | 89.334                    | 427.758                       |
| 2.000             | 9.028                       |  | 383.163                   | 57.008                    | 440.170                       |
| 2.000             | 10.417                      |  | 404.176                   | 101.926                   | 506.102                       |
| 2.000             | 9.170                       |  | 370.914                   | 73.526                    | 444.441                       |

| Impact Height | Averaged Impact force | S.E (Impact force) | Impact Height | Averaged Acceleration | S.E (Acceleration) |
|---------------|-----------------------|--------------------|---------------|-----------------------|--------------------|
| 1.000         | 6.208                 | 0.252              | 1.000         | 205.957               | 7.335              |
| 1.500         | 7.276                 | 0.252              | 1.500         | 246.829               | 13.964             |
| 2.000         | 9.426                 | 0.272              | 2.000         | 370.277               | 9.977              |

| Impact Height | Averaged Deceleration | S.E (Deceleration) |
|---------------|-----------------------|--------------------|
| 1.000         | 52.828                | 4.694              |
| 1.500         | 55.030                | 4.142              |
| 2.000         | 80.037                | 7.680              |

| Impact Height | Averaged peak to peak acceleration | S.E (peak to peak acceleration) |
|---------------|------------------------------------|---------------------------------|
| 1.000         | 258.785                            | 11.178                          |
| 1.500         | 301.860                            | 16.538                          |
| 2.000         | 450.314                            | 14.414                          |
