# Supplementary material for: Relationship of mechanical impact magnitude to neurologic dysfunction severity in a rat traumatic brain injury model
Source: PubMed Central journal article supplement (PMC5446124; doi:10.1371/journal.pone.0178186), 2017-05-26

# Frontal Cortex

Day 7

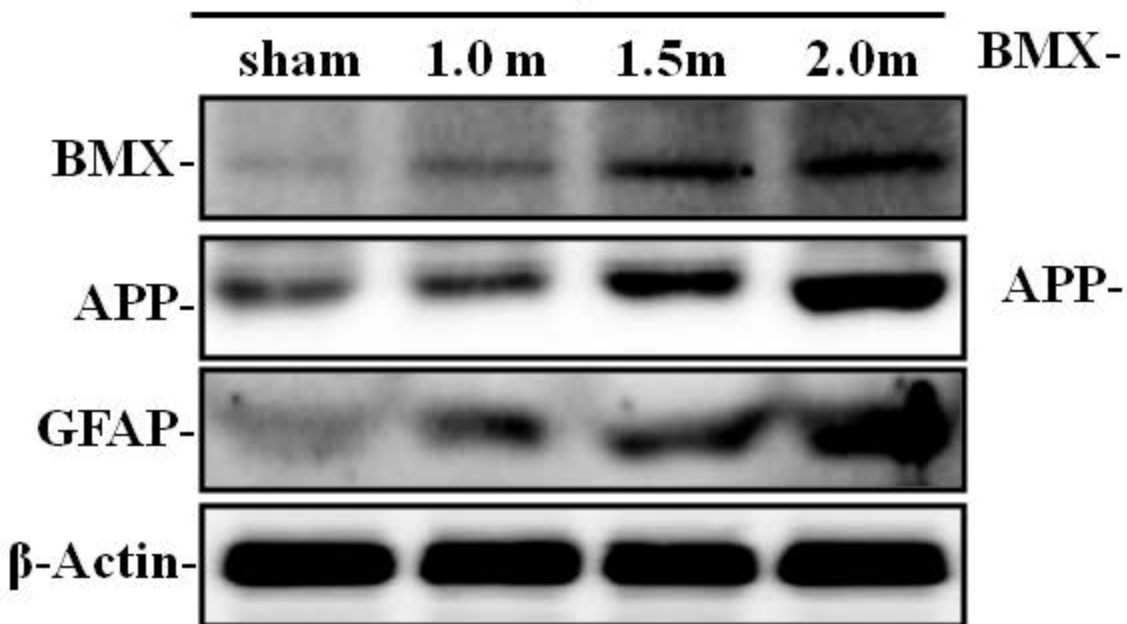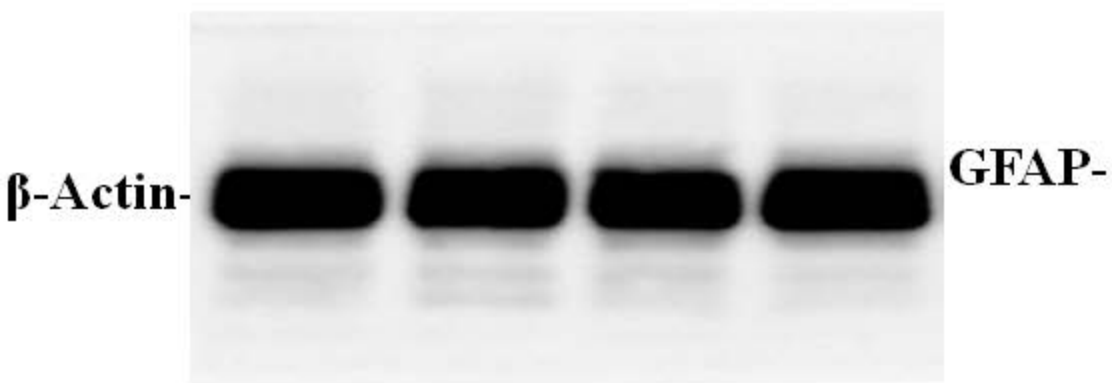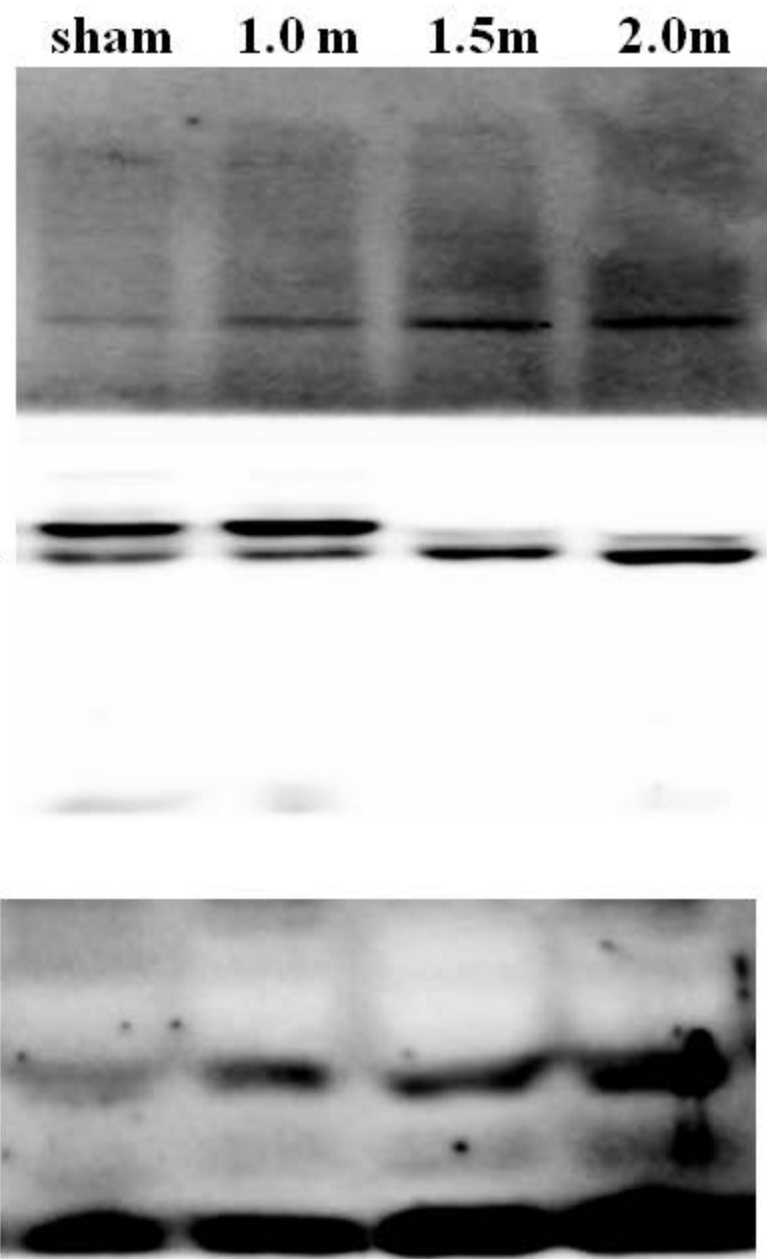

# Hippocampus

Day 7

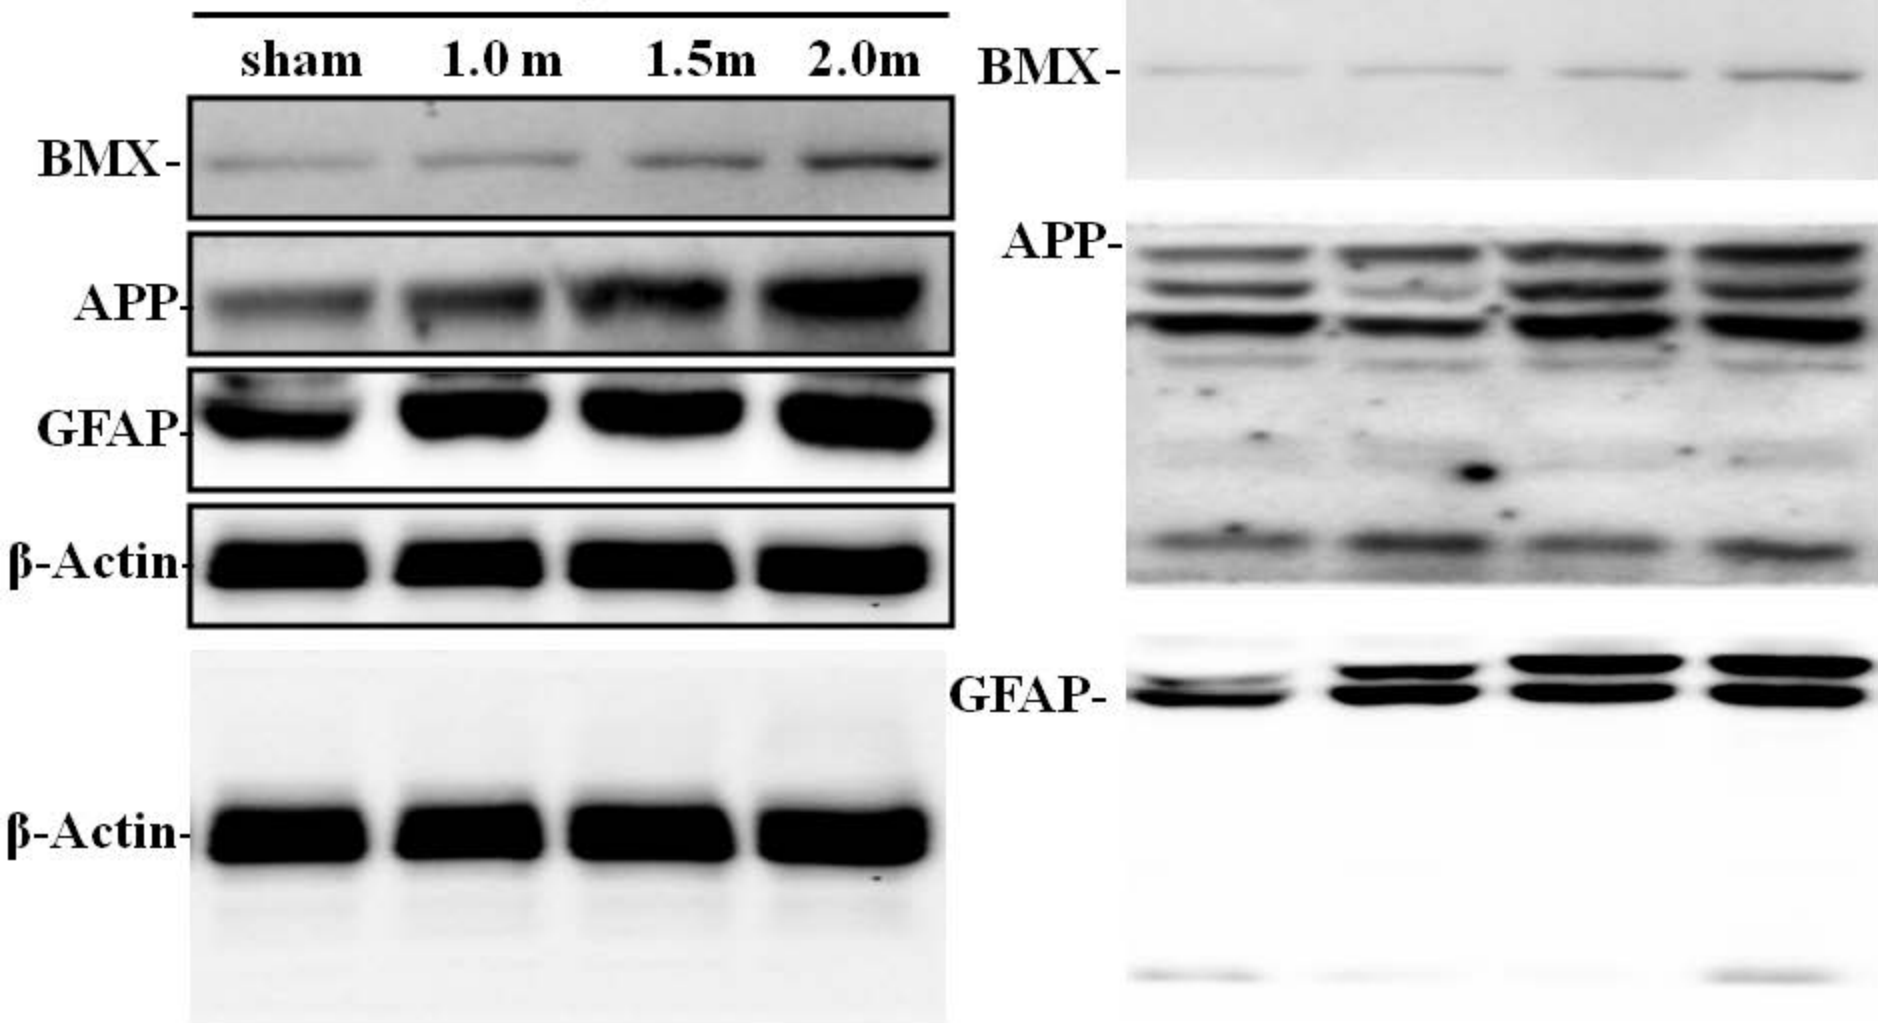

# Corpus Callosum

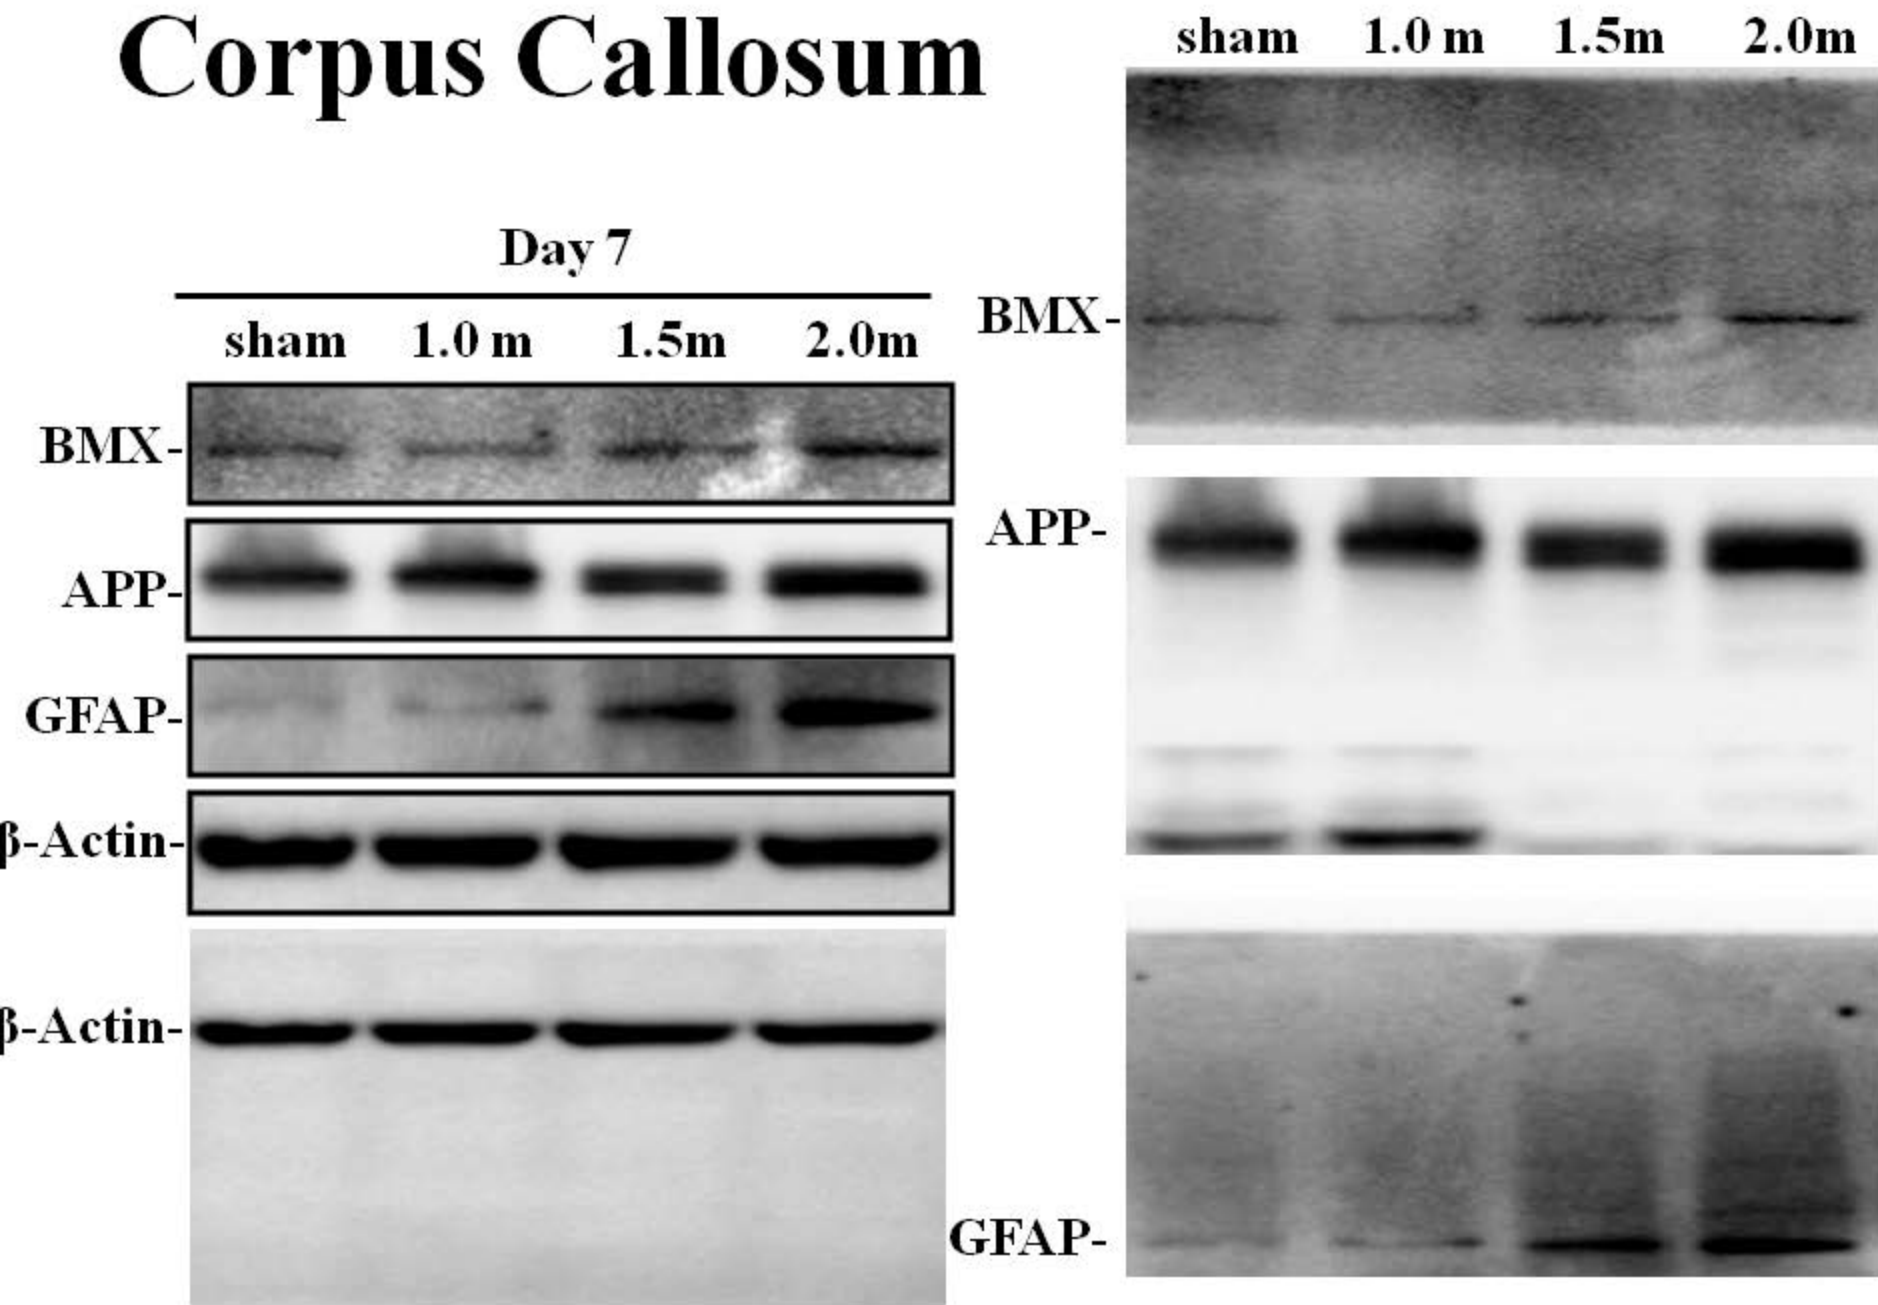

Supplement: pone.0178186.s003.pdf [file pone.0178186.s003.pdf]
